# Supplementary material
Source: PubMed Central journal article supplement (PMC3562789)
Supplement: 1218468110_pnas.201218468SI.pdf [file 1218468110_pnas.201218468SI.pdf]

# Supporting Information

Lee et al. 10.1073/pnas.1218468110

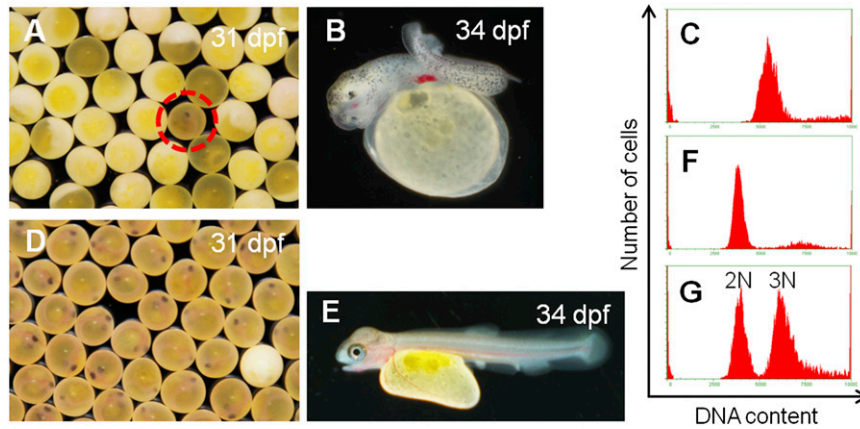

**Fig. S1.** F1 hatchlings generated from a triploid male trout without transplantation and their DNA content. (A–C) An eyed-stage egg (dashed circle) developed from a triploid male without transplantation (A), a hatchling at 34 d postfertilization (B), and its DNA content (C). (D–F) Eyed-stage eggs developed from a WT diploid trout (D) as a control of A, hatchling at 34 d postfertilization (E), and its DNA content (F). (G) DNA content of a diploid and triploid WT control.

**Table S1. Development of F1 juveniles produced by triploid male trout that had not undergone transplantation**

| Group/male trout | Age, y | Milt volume, mL | Sperm number, $\times 10^7$ | Total eggs | Fertilized, % | Eyed, % | Hatched, % | Swim-up, % |
|------------------|--------|-----------------|-----------------------------|------------|---------------|---------|------------|------------|
| <b>Triploid*</b> |        |                 |                             |            |               |         |            |            |
| T no. 1          | 4      | 1.16            | 6.8                         | 97         | 40.0          | 0       | 0          | 0          |
| T no. 2          | 4      | 0.84            | 1.2                         | 94         | 0             | 0       | 0          | 0          |
| T no. 3          | 4      | 2.47            | 67.2                        | 100        | 40.0          | 4.0     | 1.0        | 0          |
| T no. 4          | 4      | 0.76            | 2.3                         | 90         | 20.0          | 1.1     | 0.0        | 0          |
| <b>Control†</b>  |        |                 |                             |            |               |         |            |            |
| C no. 1          | 4      | NE              | 19.0                        | 105        | 100.0         | 86.7    | 81.0       | 78.1       |
| C no. 2          | 4      | NE              | 19.0                        | 91         | 90.0          | 85.7    | 80.2       | 78.0       |
| C no. 3          | 4      | NE              | 19.0                        | 107        | 100.0         | 96.3    | 90.7       | 88.8       |

NE, not examined.

\*WT triploid rainbow trout that did not undergo transplantation.

†WT diploid rainbow trout that did not undergo transplantation. Milt obtained from diploid rainbow trout was adjusted using the average sperm number ( $19.0 \times 10^7$ ) of triploid males before insemination. Eggs obtained from WT female trout were divided into seven groups and used for insemination with milt from T nos. 1–4 and C nos. 1–3.

**Table S2. Appearance rate of donor-derived haplotypes among F1 offspring of female transplant recipients**

| Group/female recipient/age | Total juveniles | Orange color (%) | GFP positive (%)* |
|----------------------------|-----------------|------------------|-------------------|
| <b>CP 98<sup>†</sup></b>   |                 |                  |                   |
| No. 1                      |                 |                  |                   |
| 3 y                        | 754             | 373 (49.5)       | 94 (47.0)         |
| 4 y                        | 2,503           | 1,214 (48.5)     | 103 (51.5)        |
| No. 2                      |                 |                  |                   |
| 3 y                        | 1,502           | 732 (48.7)       | 96 (48.0)         |
| 4 y                        | 1,481           | 740 (50.0)       | 89 (44.5)         |
| No. 3                      |                 |                  |                   |
| 3 y                        | 855             | 382 (44.7)       | 101 (50.5)        |
| 4 y                        | 1,408           | 694 (49.3)       | 105 (52.5)        |
| No. 4                      |                 |                  |                   |
| 3 y                        | 1,630           | 801 (49.1)       | 97 (48.5)         |
| 4 y                        | 3,050           | 1,473 (48.3)     | 86 (43.0)         |
| No. 5                      |                 |                  |                   |
| 3 y                        | 491             | 241 (49.1)       | 95 (47.5)         |
| 4 y                        | 697             | 356 (51.1)       | 99 (49.5)         |
| No. 6 <sup>‡</sup>         |                 |                  |                   |
| 3 y                        | 595             | 295 (49.6)       | 89 (44.5)         |
| No. 7 <sup>§</sup>         |                 |                  |                   |
| 4 y                        | 2,206           | 1,054 (47.8)     | 93 (46.5)         |
| Mean                       |                 |                  |                   |
| 3 y                        | 971             | 471 (48.5)       | 95 (47.7)         |
| 4 y                        | 1,891           | 922 (49.2)       | 96 (47.9)         |
| <b>Control<sup>¶</sup></b> |                 |                  |                   |
| No. 8                      |                 |                  |                   |
| 3 y                        | 887             | 441 (49.7)       | 96 (48.0)         |
| 4 y                        | 784             | 387 (49.4)       | 88 (44.0)         |
| No. 9                      |                 |                  |                   |
| 3 y                        | 686             | 341 (49.7)       | 87 (43.5)         |
| 4 y                        | 2,072           | 972 (46.9)       | 96 (48.0)         |
| No. 10 <sup>‡</sup>        |                 |                  |                   |
| 3 y                        | 1,774           | 878 (49.5)       | 104 (52.0)        |
| No. 11                     |                 |                  |                   |
| 3 y                        | 1,098           | 507 (46.2)       | 82 (41.0)         |
| 4 y                        | 3,129           | 1,533 (49.0)     | 98 (49.0)         |
| No. 12                     |                 |                  |                   |
| 3 y                        | 417             | 192 (46.0)       | 100 (50.0)        |
| 4 y                        | 1,094           | 543 (49.6)       | 106 (53.0)        |
| No. 13                     |                 |                  |                   |
| 3 y                        | 599             | 308 (51.4)       | 86 (43.0)         |
| 4 y                        | 1,205           | 602 (50.0)       | 92 (46.0)         |
| No. 14                     |                 |                  |                   |
| 3 y                        | 1,757           | 875 (49.8)       | 102 (51.0)        |
| 4 y                        | 2,975           | 1,461 (49.1)     | 90 (45.0)         |
| Mean                       |                 |                  |                   |
| 3 y                        | 1,031           | 506 (48.9)       | 94 (46.9)         |
| 4 y                        | 1,877           | 916 (49.0)       | 95 (47.5)         |
| <b>WT<sup>  </sup></b>     |                 |                  |                   |
| WT no. 1                   |                 |                  |                   |
| 3 y                        | 1,798           | 0                | 0                 |
| 4 y                        | 2,079           | 0                | 0                 |
| WT no. 2                   |                 |                  |                   |
| 3 y                        | 2,365           | 0                | 0                 |
| 4 y                        | 3,295           | 0                | 0                 |
| WT no. 3 <sup>‡</sup>      |                 |                  |                   |
| 3 y                        | 1,842           | 0                | 0                 |
| WT no. 4 <sup>§</sup>      |                 |                  |                   |
| 4 y                        | 2,714           | 0                | 0                 |
| Mean                       |                 |                  |                   |
| 3 y                        | 2,002           | 0                | 0                 |
| 4 y                        | 2,696           | 0                | 0                 |

\*Phenotype of *vasa-GFP* was examined from 200 randomly selected F1 juveniles within each group.

<sup>†</sup>Recipients received testicular cells taken from whole testes cryopreserved for 98 d.

<sup>‡</sup>Fish dead subsequent to spawning at age 3 y.

<sup>§</sup>Fish initially matured at age 4 y.

<sup>¶</sup>Recipients received freshly prepared testicular cells.

<sup>||</sup>WT diploid trout that did not undergo transplantation.

**Table S3. Appearance rate of donor-derived haplotypes among F1 offspring of male transplant recipients**

| Group/male recipient/age | Total juveniles | Orange color (%) | GFP positive (%) |
|--------------------------|-----------------|------------------|------------------|
| CP 98*                   |                 |                  |                  |
| No. 1                    |                 |                  |                  |
| 2 y                      | 139             | 71 (51.1)        | 74 (53.2)        |
| 3 y                      | 271             | 124 (45.8)       | 131 (48.3)       |
| 4 y                      | 267             | 129 (48.3)       | 122 (45.7)       |
| No. 2                    |                 |                  |                  |
| 2 y                      | 184             | 93 (50.5)        | 90 (48.9)        |
| 3 y                      | 275             | 137 (49.8)       | 140 (50.9)       |
| 4 y                      | 260             | 127 (48.8)       | 124 (47.7)       |
| No. 3 <sup>†</sup>       |                 |                  |                  |
| 2 y                      | 166             | 87 (52.4)        | 84 (50.6)        |
| No. 4                    |                 |                  |                  |
| 2 y                      | 112             | 53 (47.3)        | 57 (50.9)        |
| 3 y                      | 255             | 121 (47.5)       | 127 (49.8)       |
| 4 y                      | 265             | 126 (47.5)       | 122 (46.0)       |
| No. 5 <sup>†</sup>       |                 |                  |                  |
| 3 y                      | 260             | 111 (42.7)       | 125 (48.1)       |
| 4 y                      | 262             | 128 (48.9)       | 115 (43.9)       |
| No. 6 <sup>†</sup>       |                 |                  |                  |
| 3 y                      | 259             | 113 (43.6)       | 121 (46.7)       |
| 4 y                      | 238             | 103 (43.3)       | 120 (50.4)       |
| No. 7 <sup>†</sup>       |                 |                  |                  |
| 3 y                      | 270             | 138 (51.1)       | 130 (48.1)       |
| 4 y                      | 263             | 132 (50.2)       | 131 (49.8)       |
| No. 8 <sup>†</sup>       |                 |                  |                  |
| 3 y                      | 258             | 117 (45.3)       | 114 (44.2)       |
| 4 y                      | 257             | 125 (48.6)       | 118 (45.9)       |
| No. 9 <sup>†</sup>       |                 |                  |                  |
| 3 y                      | 263             | 139 (52.9)       | 124 (47.1)       |
| 4 y                      | 254             | 130 (51.2)       | 126 (49.6)       |
| No. 10 <sup>†</sup>      |                 |                  |                  |
| 4 y                      | 276             | 135 (48.9)       | 138 (50.0)       |
| Mean                     |                 |                  |                  |
| 2 y                      | 150             | 76 (50.3)        | 76 (50.9)        |
| 3 y                      | 264             | 125 (47.3)       | 127 (47.9)       |
| 4 y                      | 260             | 126 (48.4)       | 124 (47.7)       |
| Control <sup>§</sup>     |                 |                  |                  |
| No. 11                   |                 |                  |                  |
| 2 y                      | 151             | 75 (49.7)        | 78 (51.7)        |
| 3 y                      | 277             | 132 (47.7)       | 137 (49.5)       |
| 4 y                      | 263             | 130 (49.4)       | 129 (49.0)       |
| No. 12                   |                 |                  |                  |
| 2 y                      | 158             | 79 (50.0)        | 78 (49.4)        |
| 3 y                      | 274             | 156 (56.9)       | 138 (50.4)       |
| 4 y                      | 244             | 119 (48.8)       | 116 (47.5)       |
| No. 13                   |                 |                  |                  |
| 2 y                      | 186             | 91 (48.9)        | 88 (47.3)        |
| 3 y                      | 273             | 123 (45.1)       | 144 (52.7)       |
| 4 y                      | 260             | 126 (48.5)       | 123 (47.3)       |
| No. 14                   |                 |                  |                  |
| 2 y                      | 162             | 80 (49.4)        | 73 (45.1)        |
| 3 y                      | 273             | 138 (50.5)       | 147 (53.8)       |
| 4 y                      | 267             | 133 (49.8)       | 137 (51.3)       |
| No. 15                   |                 |                  |                  |
| 2 y                      | 114             | 55 (48.2)        | 54 (47.4)        |
| 3 y                      | 210             | 105 (50.0)       | 99 (47.1)        |
| 4 y                      | 230             | 117 (50.9)       | 113 (49.1)       |
| No. 16 <sup>†</sup>      |                 |                  |                  |
| 2 y                      | 146             | 76 (52.1)        | 72 (49.3)        |
| No. 17 <sup>†</sup>      |                 |                  |                  |
| 3 y                      | 270             | 121 (44.8)       | 135 (50.0)       |
| 4 y                      | 265             | 126 (47.5)       | 129 (48.7)       |

Table S3. Cont.

| Group/male recipient/age | Total juveniles | Orange color (%) | GFP positive (%) |
|--------------------------|-----------------|------------------|------------------|
| No. 18 <sup>‡</sup>      |                 |                  |                  |
| 3 y                      | 262             | 120 (45.8)       | 132 (50.4)       |
| 4 y                      | 251             | 124 (49.4)       | 116 (46.2)       |
| No. 19 <sup>‡</sup>      |                 |                  |                  |
| 3 y                      | 264             | 142 (53.8)       | 151 (57.2)       |
| 4 y                      | 246             | 119 (48.4)       | 107 (43.5)       |
| No. 20 <sup>‡</sup>      |                 |                  |                  |
| 3 y                      | 265             | 132 (49.8)       | 128 (48.3)       |
| 4 y                      | 237             | 120 (50.6)       | 122 (51.5)       |
| No. 21 <sup>‡</sup>      |                 |                  |                  |
| 3 y                      | 266             | 118 (44.4)       | 132 (49.6)       |
| 4 y                      | 249             | 125 (50.2)       | 105 (42.2)       |
| No. 22 <sup>‡</sup>      |                 |                  |                  |
| 3 y                      | 279             | 132 (47.3)       | 138 (49.5)       |
| 4 y                      | 252             | 131 (52.0)       | 120 (47.6)       |
| Mean                     |                 |                  |                  |
| 2 y                      | 153             | 76 (49.7)        | 74 (48.3)        |
| 3 y                      | 265             | 129 (48.7)       | 135 (50.8)       |
| 4 y                      | 251             | 125 (49.6)       | 120 (47.6)       |
| WT <sup>¶</sup>          |                 |                  |                  |
| WT no. 1 <sup>†</sup>    |                 |                  |                  |
| 2 y                      | 165             | 0                | 0                |
| WT no. 2 <sup>‡</sup>    |                 |                  |                  |
| 3 y                      | 255             | 0                | 0                |
| 4 y                      | 272             | 0                | 0                |
| WT no. 3                 |                 |                  |                  |
| 2 y                      | 145             | 0                | 0                |
| 3 y                      | 273             | 0                | 0                |
| 4 y                      | 274             | 0                | 0                |
| WT no. 4                 |                 |                  |                  |
| 2 y                      | 157             | 0                | 0                |
| 3 y                      | 267             | 0                | 0                |
| 4 y                      | 262             | 0                | 0                |
| WT no. 5                 |                 |                  |                  |
| 2 y                      | 261             | 0                | 0                |
| 3 y                      | 268             | 0                | 0                |
| 4 y                      | 277             | 0                | 0                |
| Mean                     |                 |                  |                  |
| 2 y                      | 182             | 0                | 0                |
| 3 y                      | 265             | 0                | 0                |
| 4 y                      | 271             | 0                | 0                |

\*Recipients received testicular cells taken from whole testes cryopreserved for 98 d.

<sup>†</sup>Fish dead subsequent to maturation at age 2 y.

<sup>‡</sup>Fish initially matured at age 3 or 4 y.

<sup>§</sup>Recipients received freshly prepared testicular cells.

<sup>¶</sup>WT diploid trout that did not undergo transplantation.
